# Supplementary material for: On the Mismatches between the Monetary and Social Values of Air Purification in the Colombian Andean Region: A Case Study
Source: MDPI journal article supplement (doi:10.3390/f12091274), 2021-09-17
Supplement: s1 [file s1]

Archive with 1 entries (1 files):
- forests-1355263-supplementary.pdf
