# Supplementary material for: On the Mismatches between the Monetary and Social Values of Air Purification in the Colombian Andean Region: A Case Study
Source: MDPI journal article supplement (doi:10.3390/f12091274), 2021-09-17
Supplement: s1 [file s1 › forests-1355263-supplementary.pdf]

Table S1. Areas with environmental importance areas in the Municipalities.

| Type                            | Description                                  | Municipality |        |
|---------------------------------|----------------------------------------------|--------------|--------|
|                                 |                                              | Aguadas      | Pácora |
| Ecological characteristics (Ha) |                                              |              |        |
| Areas of local interest         | Aqueduct supplying areas                     | 215          | 419    |
|                                 | Hydraulic environmental protection zone      | 103          | 118    |
| Regional interest areas         | Protective forest belt                       | 8351         | 5637   |
|                                 | Indirect water recharge of high importance   | 14           | -      |
|                                 | Indirect water recharge of medium importance | 10,360       | 15     |
| Strategic ecosystems            | Dry forest                                   | 95           | 410    |
|                                 | Nevados national park                        |              |        |
|                                 | Sonsón (paramo)                              | 620          | 194    |
| Cultural heritage               | Cultural coffee landscape                    | 1,407        | 3,507  |
| National heritage               | Municipality heritage                        | 350          | -      |
| Forest reserve (Law 2/ 1959)    | Central forest reserve                       | 4007         | 319    |
| Rural Civil Society Reserve     | La Gloria                                    | 218          | -      |
|                                 | La Virginia                                  | -            | 377    |
| Protective forest reserve       | El Diamante                                  | -            | -      |
|                                 | Tarcará                                      | 726.94       | -      |
| Total                           | Northern Caldas                              | 25,740       | 10,995 |

Table S2. Ecosystem Services identification and prioritization

| Land cover/ecosystem                       | Benefit                |                   |                 |               |                    |
|--------------------------------------------|------------------------|-------------------|-----------------|---------------|--------------------|
|                                            | Example 1              |                   | Example 2       | Example 3     |                    |
| Example: water body                        |                        |                   |                 |               |                    |
| Ecosystem services                         | Valuation scale        |                   |                 |               |                    |
|                                            | Very few important (1) | Few important (2) | Indifferent (3) | Important (4) | Very important (5) |
| Example:<br>Drinking water                 |                        |                   |                 |               |                    |
| Prioritized ecosystem services (consensus) |                        |                   |                 |               |                    |
| Justification                              |                        |                   |                 |               |                    |
